1 **ARTICLE SUMMARY LINE**

2 This first report of *Mycoplasma genitalium* in Papua New Guinea finds a high burden (12.5%)  
3 among 699 pregnant women. Additionally, more than one in two women were positive for a treatable  
4 reproductive tract infection associated with poor health outcomes.

5 **RUNNING TITLE:**

6 *Mycoplasma genitalium* in PNG

7 **Keywords:** Sexually transmitted infections; mycoplasma genitalium; pregnant women; Papua New  
8 Guinea

9

10 **High burden of *Mycoplasma genitalium* and other reproductive tract infections among**  
11 **pregnant women in Papua New Guinea**

12

13 **AUTHORS AND AFFILIATIONS:**

14 Michelle J. L. Scoullar<sup>1,2\*</sup>, Philippe Boeuf<sup>1,2</sup>, Elizabeth Peach<sup>1</sup>, Ruth Fidelis<sup>1</sup>, Kerryanne Tokmun<sup>1</sup>,  
15 Pele Melepia<sup>1</sup>, Arthur Elijah<sup>5</sup>, Catriona S. Bradshaw<sup>2,3,4</sup>, Glenda Fehler<sup>3</sup>, Peter M. Siba<sup>6</sup>, Simon  
16 Erskine<sup>7</sup>, Elisa Mokany<sup>7</sup>, Elissa Kennedy<sup>1</sup>, Alexandra J. Umbers<sup>1</sup>, Stanley Luchters<sup>1,4,8,9</sup>, Leanne J.  
17 Robinson<sup>1,2,4,6</sup>, Nicholas C. Wong<sup>4</sup>, Andrew Vallely<sup>6,10</sup>, Steven G. Badman<sup>10</sup>, Lisa M. Vallely<sup>6,10,11</sup>,  
18 HMHB Study Team<sup>12</sup>, Freya J. I. Fowkes<sup>1,2,4</sup>, Christopher Morgan<sup>1,2,4</sup>, William Pomat<sup>6</sup>, Brendan S.  
19 Crabb<sup>1,2,4</sup>, James G. Beeson<sup>1,2,4\*</sup>

20

21 <sup>1</sup>Burnet Institute, Melbourne, Australia; Burnet Institute, Kokopo, Papua New Guinea.

22 <sup>2</sup>University of Melbourne, Melbourne, Australia.

23 <sup>3</sup>Melbourne Sexual Health Centre, Alfred Hospital, Melbourne, Australia

24 <sup>4</sup>Monash University, Melbourne, Australia.

25 <sup>5</sup>School of Medicine and Health Sciences, University of Papua New Guinea, Papua New Guinea.

26 <sup>6</sup>Papua New Guinea Institute of Medical Research, Goroka, Papua New Guinea.

27 <sup>7</sup>SpeeDx Pty Ltd, Sydney, NSW, Australia.

28 <sup>8</sup>Department of Population Health, Aga Khan University, Nairobi, Kenya

29 <sup>9</sup>International Centre for Reproductive Health, Department of Public Health and Primary Care, Ghent  
30 University, Belgium.

31 <sup>10</sup>The Kirby Institute, University of New South Wales, Sydney, Australia.

32 <sup>11</sup>Australian Institute of Tropical Health and Medicine, James Cook University, Townsville,  
33 Australia.

34 <sup>12</sup>HMHB Study Team also includes researchers and health managers from the PNG Institute of  
35 Medical Research, the University of PNG, the PNG National Department of Health, East New  
36 Britain Provincial Government and the Kirby Institute, University of New South Wales Australia.

37 **Corresponding authors:** Michelle Scoullar, [michelle.scoullar@burnet.edu.au](mailto:michelle.scoullar@burnet.edu.au); James Beeson,  
38 [beeson@burnet.edu.au](mailto:beeson@burnet.edu.au)

39 85 Commercial Road, Melbourne, VIC 3004. +61 3 9282 2111

40 **Article Type:** Major Article

41 **Abstract** 147 words

42 **Main Text** 3500

43

44 **ABSTRACT**

45 There is a pressing need for detailed knowledge of the range of pathogens, extent of co-infection and  
46 clinical impact of reproductive tract infections (RTIs) among pregnant women. Here, we report on  
47 RTIs (*Mycoplasma genitalium*, *Chlamydia trachomatis*, *Neisseria gonorrhoeae*, *Trichomonas*  
48 *vaginalis*, *Treponema pallidum subspecies pallidum*, bacterial vaginosis and vulvovaginal  
49 candidiasis) and other sexual and reproductive health indicators among 699 pregnant women in  
50 Papua New Guinea (PNG). We found widespread *M. genitalium* infection (12.5% of women), the  
51 first time this pathogen has been reported in PNG, with no evidence of macrolide resistance. Most  
52 pregnant women (76.2%) had at least one RTI, most of which are treatable. Excluding syphilis,  
53 sexually-transmitted infections were detected in 37.8% women. Syndromic management of  
54 infections is greatly inadequate and there was remarkably little use of contraception; 98.4% report  
55 never having used barrier contraception. This work has implications for improving maternal and  
56 child health in PNG.

57

58

## 59 BACKGROUND

60 Reproductive Tract Infections (RTIs), including Sexually Transmitted Infections (STIs), are a  
61 preventable health burden. Of over 30 well recognised STIs, four are referred to as curable STIs:  
62 *Chlamydia trachomatis*, *Neisseria gonorrhoeae*, *Trichomonas vaginalis* and *Treponema pallidum*  
63 *subspecies pallidum* (syphilis). An estimated 376.4 million new adult cases of these four infections  
64 occur annually and the World Health Organization (WHO) Western Pacific Region has the highest  
65 number of annual incident cases, estimated at 142 million(1-3). Other RTIs, such as bacterial  
66 vaginosis (BV) and *Candida* spp. causing vulvovaginal candidiasis (VVC) are common, but global  
67 estimates less available and challenged by differing diagnostic methodologies for BV(4) and that  
68 *Candida* spp can be pathogenic and commensal. Notwithstanding this, BV estimates range from 8%  
69 to 51% in pregnant women(5) and *Candida* spp. can be isolated from vaginal samples in 20-30% of  
70 asymptomatic women and 40% of symptomatic women (6). Women with RTIs can experience  
71 substantial pain and discomfort and may be subject to debilitating stigma(7). Complications can  
72 include pelvic inflammatory disease (PID), infertility, increased risk of acquisition and transmission  
73 of other STIs; and in pregnancy can result in miscarriage, stillbirth, preterm birth (PTB), neonatal  
74 death, and serious neonatal morbidities such as blindness, congenital malformations and lifelong  
75 disability(1, 8, 9).

76 The curable STI *Mycoplasma genitalium* has recently emerged as an important cause of poor  
77 sexual health, associated with PID, cervicitis, miscarriage and PTB(10, 11). Data on prevalence is  
78 more limited than for other curable STIs, available reports range from below 1% in the general adult  
79 population to 15.9% in high risk groups(12, 13), and in pregnancy from 0.7% in the United  
80 Kingdom(14) to 11.9% in the Solomon Islands(15). Importantly, there has been a marked decline in  
81 azithromycin cure over the past decade, with some areas reporting macrolide resistance as high as  
82 68%(16-18). However, in many regions, the importance of *M. genitalium* is largely unrecognised due  
83 to a lack of data on prevalence and drug sensitivity.

84 Papua New Guinea (PNG) is a Pacific nation with more than 8.5 million people(19) and high  
85 rates of *C. trachomatis*, *N. gonorrhoeae* and *T. vaginalis* that exceed those seen in other high burden  
86 regions such as sub-Saharan Africa (1, 20). However, there are no reports on the prevalence of *M.*  
87 *genitalium*. In this study we evaluated the prevalence of *M. genitalium* and molecular markers of  
88 resistance, as well as rates of other RTIs and curable STIs, among pregnant women attending  
89 antenatal clinics in East New Britain Province (ENBP) of PNG. We investigated the relationships  
90 between different RTIs, factors associated with infection, and compared the performance of  
91 syndromic management to more accurate molecular and rapid test diagnostics.

92

## 93 **METHODS**

### 94 **Study site and population**

95           This study uses cross-sectional baseline data from 699 pregnant women attending their first  
96 antenatal clinic (ANC1) who were enrolled into a prospective cohort study “Healthy Mothers  
97 Healthy Babies” (HMHB) undertaken across five health facilities in ENBP, PNG. Enrolment  
98 occurred between March 2015 and June 2017. Women aged 16 years or older, living in the facilities’  
99 catchment area and attending clinic for the first time in the current pregnancy regardless of gestation,  
100 were eligible to participate. At each site women were randomly selected and invited to participate.  
101 After eligibility screening and informed consent, a questionnaire was administered by a trained  
102 research officer. We collected socio-demographic and clinical information, after which biological  
103 samples were obtained, including self-collected vaginal swabs, urine, capillary finger prick and  
104 venous blood samples. All abnormal results available at the point-of-care (urine dipstick, syphilis,  
105 malaria, haemoglobin) were communicated directly to the participant, the health care provider and  
106 documented in the individual client-held health record book, at the time of interview, to enable  
107 treatment by the health care provider.

### 108 **Study procedures**

109           Routine antenatal care was provided by the health facility staff in line with PNG national  
110 guidelines (Supplemental methods)(21, 22). As per national STI syndromic management guidelines,  
111 women reporting current abnormal vaginal discharge receive: intravaginal nystatin pessaries  
112 (100,000 units, twice daily for 7 days) or a clotrimazole pessary once followed by intravaginal  
113 clotrimazole cream for 7 days; amoxicillin 2g orally (PO); probenecid 1g PO; augmentin 2 tablets  
114 PO, and azithromycin 1g PO.

115           Two self-collected vaginal swabs were provided by each participant; one was used to prepare  
116 a vaginal smear for microscopy, and each swab was then placed into a DNA preserving transport

117 medium tube, stored in a chilled cooler and returned to the laboratory at the end of each day. Urine  
118 samples were collected in a sterile container, placed on ice and later stored at -20 degrees Celsius.  
119 Swabs were tested in ENB for *C. trachomatis*, *N. gonorrhoea* and *T. vaginalis*; other samples were  
120 shipped to Burnet Institute Melbourne, Australia in batches. In cases where testing was delayed,  
121 specimens were stored at 2-7°C or at -20°C if an extended delay was anticipated. Molecular testing  
122 usually occurred within seven days with results communicated back to participants and treatment  
123 advised for themselves and their partner.

## 124 **Laboratory methods**

125 The GeneXpert molecular platform (Cepheid, Sunnyvale CA, USA) was used to test vaginal  
126 and urine specimens at the Burnet / PNG Institute of Medical Research (PNG IMR) laboratory,  
127 Vunapope Hospital Kokopo for *C. trachomatis*, *N. gonorrhoea* and *T. vaginalis*. Lifetime exposure  
128 to *T. pallidum* (syphilis) was determined to be positive if women tested positive by Alere  
129 Determine™ Syphilis TP (Abbott, Illinois, USA). This was initially performed at health facilities in  
130 line with national guidelines; however, inconsistency in test availability at different sites meant the  
131 research team supplied rapid tests for study women.

132 Shipped vaginal specimens were stored at the Burnet Institute Melbourne at -20 or -80°C  
133 until all samples had been received. After thawing, genomic DNA was extracted using the QIAamp®  
134 BiOstic® Bacteremia DNA kit (QIAGEN N.V, Venlo, The Netherlands). To optimise this protocol  
135 for vaginal specimens rather than cultured blood, the total volume of sample required was adjusted to  
136 450µl. Extracted DNA was tested for *M. genitalium* using the *ResistancePlus*® MG kit (SpeeDx,  
137 Sydney, Australia) which uses the PlexPCR® and PlexPrime® technologies (SpeeDx) for concurrent  
138 amplification of *M. genitalium* and detection of five *M. genitalium* point mutations (A2058G,  
139 A2058C, A2058T, A2059G, and A2059C) within the macrolide resistance-determining region  
140 (MRDR) of the 23S rRNA gene(17). The *ResistancePlus*® MG kit is commercially available,  
141 approved by Therapeutic Goods Administration Australia, and has a sensitivity and specificity of

142 98% and 100% for *M. genitalium* and 96% and 100% for macrolide resistance mutations(23-25).  
143 Gram-stained vaginal smears were read by an experienced microscopist at Melbourne Sexual Health  
144 Centre. BV diagnosis was based on Nugent scoring (BV, Nugent score 7 to 10) and presumptive  
145 diagnosis of candidiasis was based on observation of pseudohyphae and or budding yeasts. Because  
146 the diagnosis of *M. genitalium*, BV and VVC was on stored samples many months after collection it  
147 was not possible to specifically treat those women who tested positive beyond any syndromic  
148 management they would have received as part of national guidelines.

#### 149 **Data management and statistical analysis**

150 Questionnaire responses were entered by research officers directly into an electronic tablet (e-  
151 tablet) using a study specific questionnaire on the platform Mobile Data Studio 7.3 (MDS,  
152 CreativityCorp Pty Ltd, Perth, Australia), and stringent data management protocols were in place  
153 (supplemental methods).

154 Exposures of interest included clinic details (enrolment clinic; rural or urban); participant  
155 characteristics at enrolment and relevant obstetric history (see supplemental methods for a full list of  
156 variables and definitions). Outcomes measured were *M. genitalium*, *C. trachomatis*, *N.gonorrhoea*,  
157 *T. vaginalis*, *T. pallidum* (syphilis), BV and VVC. The association between exposures and *C.*  
158 *trachomatis*, *N. gonorrhoea*, *T. vaginalis*, *M. genitalium* and syphilis were assessed using logistic  
159 regression. All variables of interest were included in univariable analyses and variables associated  
160 with the outcome at  $p < 0.10$  in univariable analyses were included in a multivariable model along  
161 with the pre-specified variable of enrolment clinic site.

#### 162 **Ethical considerations and informed consent procedures**

163 All participants provided individual written, informed consent. Ethical approval was provided  
164 from the Medical Research Advisory Committee of the PNG National Department of Health (No.  
165 14.27), the PNG IMR Institutional Review Board (No. 1114) and the Human Research Ethics



166 Committee of the Alfred Hospital (No. 348/14) in Australia. Provincial approval was obtained from  
167 the East New Britain Province (ENBP) Executive Committee, participating facilities and a series of  
168 community engagement meetings provided broader community support and assent for the study.

169

## 170 RESULTS

171 A total of 699 pregnant women were enrolled at five antenatal clinics in East New Britain  
172 Province (ENBP). Median maternal age was 26 years (interquartile range, IQR 22-30), a quarter of  
173 women were primigravida (177/699, 25.4%), the majority were married / co-habiting (663/697,  
174 95.1%) and 46.5% had only completed primary school (325/698) (Table 1).

175 Current abnormal vaginal discharge was reported by 14.0% (98/697), an additional 37  
176 women reported abnormal vaginal discharge at some point in this pregnancy prior to clinic  
177 attendance (total symptomatic discharge in pregnancy 19.3%, 135/698). Most women (82.5%,  
178 569/690) had never used a modern method of contraception, with only 11 women (1.6%, 11/690)  
179 reporting having ever used either a male or female condom.

### 180 High burden of reproductive tract infections in pregnancy

181 Of the 699 women enrolled, prevalence of *M. genitalium* was 12.5% (78/625; 95% CI 10.0-  
182 15.4), with no evidence of macrolide resistant mutations (Table 2). Other RTIs were: *C. trachomatis*  
183 19.1% (122/640; 95% CI 16.1-22.4), *N. gonorrhoeae* 5.5% (35/640; 95% CI 3.9-7.6), *T. vaginalis*  
184 20.2% (117/581; 95% CI 17.0-23.7) and prevalence of lifetime exposure to syphilis was extremely  
185 high at 18.1% (79/437; 95% CI 14.6-22.1). Of the 503 vaginal smears available for microscopy, BV  
186 prevalence was 25.7% (129/503; 95% CI 21.9-29.7) and 39.4% (198/503; 95% CI 35.1-43.8) had  
187 presumptive candidiasis detected on microscopy (VVC).

188 The majority of women (76.2%, 272/357), had at least one current RTI (BV, VVC, *M.*  
189 *genitalium*, *C. trachomatis*, *N. gonorrhoea* or *T. vaginalis*), with at least one current STI present in  
190 37.8% (183/485, *M. genitalium*, *C. trachomatis*, *N. gonorrhoea* or *T. vaginalis*). One in three women  
191 (32.1%, 175/546) had a current STI diagnosed using GeneXpert (*C. trachomatis*, *N. gonorrhoea* or  
192 *T. vaginalis*), 11.4% (75/661) had at least two co-existing STIs, 15 women (2.8%, 15/536) had at  
193 least three infections and one woman had all four STIs.

## 194 **Relationships between infections**

195           Of the 78 women with *M. genitalium*, 28 women (35.9%) had a concurrent STI detected: 20  
196 (25.6%) had co-infection with *C. trachomatis*, 13 (16.7%) had co-infection with *T. vaginalis* and 6  
197 (7.7%) had *N. gonorrhoeae* (Figure 1 and Table S2). Co-infections were most frequent in women  
198 positive for *N. gonorrhoea* (80%, 28/35), with the majority of these women having a co-infection  
199 with *C. trachomatis* (71.4%, 25/35) followed by *T. vaginalis* (22.8%, 8/35) and *M. genitalium*  
200 (17.1%, 6/35). Syphilis was not included in estimates of co-infections as it was not known if their  
201 exposure represented current or previous infection.

202           Of 129 women with bacterial vaginosis, 37.2% (48/129) had a co-infection, the most  
203 common of which was *C. trachomatis* 22.5% (29/129), followed by *T. vaginalis* (12.4%, 16/129), *M.*  
204 *genitalium* (11.6%, 15/129) and *N. gonorrhoea* (7.7%, 10/129) (Table S3).

## 205 **Relationship between abnormal vaginal discharge and infection**

206           We compared clinical symptoms used in PNG national treatment guidelines (current  
207 abnormal vaginal discharge) with an alternative question of abnormal vaginal discharge currently or  
208 at any time in pregnancy up to their first antenatal clinic visit (ANC1) (Table 3). A total of 98  
209 women (14.1%, 98/697) had current symptoms that would have prompted treatment as per PNG  
210 national guidelines. An additional 37 women experienced abnormal vaginal discharge earlier in the  
211 pregnancy, but no current symptoms, and therefore would not normally receive treatment.

212           Most current STIs were asymptomatic. Neither the standard question used in national  
213 guidelines nor the alternative question performed well as a marker of infection. Of those women with  
214 an STI detected, no current symptoms were reported by 84.1% (154/183), and even with the more  
215 inclusive alternative question, 77.0% (141/183) reported no history of symptoms either currently or  
216 at any time earlier in the pregnancy. Of the women with *M. genitalium*, 78.2% (61/78) had no

217 symptoms either currently or at any time in the pregnancy up to ANC1, and only 12 women (15.4%,  
218 12/78) would have been treated using current syndromic management.

219         Asking if women had any symptoms in pregnancy up to and including the current time (the  
220 alternative question) was consistently more sensitive for any individual infection or group of  
221 infections compared the standard question (Figure 2); despite this, sensitivity remained below 30%.  
222 The alternative question did perform better to distinguish those women with *T. vaginalis* infection  
223 ( $p=0.005$ ) (Table S4), and VVC ( $p=0.007$ ) compared to the current question.

#### 224 **Factors associated with curable STI infection**

225         There was no factor in either univariable (Table S5) or multivariable (Table 4) analysis found  
226 to be associated with an increased odds of *M. genitalium* infection. Given first pregnancy and  
227 younger women had a collinear relationship, only pregnancy number was included in the  
228 multivariable analysis. Those in their first pregnancy, employment, those who were single or  
229 separated and those with abnormal vaginal discharge at any time in the pregnancy up to and  
230 including ANC1 were all identified as risk factors for different STIs to varying degrees of statistical  
231 significance. Not having used a modern method of contraception appeared to be an important risk  
232 factor for a number of STIs in univariable analyses; however this association weakened in  
233 multivariable analysis. Risk of exposure to syphilis appeared to vary depending on clinic site.

234

## 235 **DISCUSSION**

236 We report the first data on *M. genitalium* in PNG, finding that pregnant women in PNG have  
237 one of the highest infections rates globally, with a striking absence of macrolide resistance despite  
238 resistance rates of up to 68%(18) in neighbouring regions such as Australia. The high prevalence of  
239 *M. genitalium* (12.5%) among pregnant women shown here equates to an estimated 13,000 prevalent  
240 cases (95% CI 10,342 to 15,823) of *M. genitalium* among women of reproductive age (15 to 49  
241 years) in the province (Supplemental methods). Additionally, these are the first data on RTIs to be  
242 reported from the New Guinea Islands region of PNG in over twenty years and provides a more  
243 complete understanding of the burden of RTIs in pregnancy(26). This study indicates that more than  
244 one in two women (55.2%) have a treatable RTI (BV and or current STI) that causes harmful sexual  
245 and reproductive health outcomes and is not detected by current antenatal screening in PNG. Given  
246 that PNG has one of the largest populations among Pacific islands, these findings have major public  
247 health and regional significance.

248 There is currently no global *M. genitalium* surveillance, limiting our understanding of its  
249 epidemiology. High-income countries report rates of *M. genitalium* infection ranging from 0.3 to  
250 3.3%(11, 13, 27) in the general population, with higher estimates in certain risk groups(28, 29).  
251 Fewer data are available from low- and middle- income countries (LMICs) but it appears prevalence  
252 may be higher ranging from 3% in the general population in Tanzania(13) to 8-9% in Honduras and  
253 South Africa(13, 30). The highest burden has been reported amongst those who sell sex, 16% in  
254 Kenya(31) and 26% in Uganda(32). Data specific to pregnancy remains limited despite the  
255 association with adverse pregnancy outcomes(28); in the United Kingdom and France prevalence  
256 among pregnant women is low (0.7-0.8%(14, 33)) with higher rates reported from Guinea-Bissau  
257 (6.2%)(34) and the Solomon Islands (11.9%)(15). Clearly more data on the burden of *M. genitalium*  
258 in pregnancy, and its consequences, are needed.

259           Recent data from the Solomon Islands examined the impact of mass drug administration  
260 (MDA) of 1g of azithromycin orally for the elimination of ocular *C. trachomatis* on *M. genitalium*  
261 and reported a pre-MDA *M. genitalium* prevalence of 11.9% (95% CI 8.3 – 16.6%; n=236) among  
262 women attending antenatal clinics. Post MDA *M. genitalium* prevalence remained high at 10.9%  
263 with no evidence of macrolide resistance in either pre- or post-MDA groups; however this is not  
264 surprising given only 5 of the 28 women positive for *M. genitalium* in the post-MDA group reported  
265 receiving azithromycin(15). The lack of macrolide resistance in *M. genitalium* infections in PNG  
266 found in this study was striking and warrants further exploration in other populations in PNG. While  
267 it may reflect a lack of exposure to macrolides in this population, macrolides are available and used  
268 widely in PNG, and their use has repeatedly been associated with an increase in macrolide resistant  
269 isolates in other settings.

270           The burden of curable STIs observed among pregnant women reported here is substantially  
271 greater than most settings included in the 2018 global estimates of curable STIs(3). The 32.1%  
272 observed prevalence of at least one current STI diagnosable by GeneXpert is lower than the 42.7%  
273 reported in a study of antenatal clinics from Eastern Highlands, Hela and Central Provinces of PNG  
274 in 2014(20), but similar to that reported in Madang Province in 2012 (33.7%)(35). *C. trachomatis*  
275 prevalence (19.1%) is consistent with recent reports from other provinces (Vallely 2016 (22.9%),  
276 Badman 2016 (20.0%)) and neighbouring Solomon Islands (20.3%)(36). These latter three studies  
277 were the highest reported rates from any study in the global prevalence estimates(3). Similarly for *N.*  
278 *gonorrhoea* in pregnancy, PNG and Solomon Islands have the highest reported rates globally (5.1%  
279 to 14.2%)(35-38), although two studies from South Africa also report very high rates at 10.1% in a  
280 primary care setting(39) and 6.4% among pregnant women(40). Regarding *T. vaginalis*, recent PNG  
281 estimates among pregnant women are generally higher than the 20.2% reported in this study (21.3-  
282 37.6%.(35, 37, 38, 41)).

283 Risk factors for STIs identified in this study (primigravida, employed, single/separated or  
284 having abnormal vaginal discharge at some point in the pregnancy up to ANC1) could have a  
285 number of explanations. Younger women in their first pregnancy may have had less interaction with  
286 reproductive health services, and employed women may be more mobile with an associated increase  
287 risk of STI acquisition through unprotected sex. Interestingly, no risk factors were identified for *M.*  
288 *genitalium*. Risk factors for STIs in pregnancy reported elsewhere in PNG include more than one  
289 lifetime sexual partner, level of education of the woman or her partner, rurality, previous miscarriage  
290 or stillbirth, and socioeconomic status(20, 35).

291 This study also provides important data regarding BV and VVC, with 58.3% of women  
292 having at least one of these infections. VVC is readily treatable(42) and can cause extreme  
293 discomfort in addition to increasing a woman's risk of post-partum breast candidiasis with potential  
294 impact on breastfeeding. The prevalence reported here (39.4%) is higher than the only previous  
295 report from PNG in 1991 (23%)(43), comparisons with other LMICs are difficult as data is limited  
296 and not contemporary(42, 44). The prevalence of one in four women with BV reported here is higher  
297 than previous reports in PNG (17.6%)(41) but in keeping with recent global estimates of 23-29%(5).  
298 However, our results may underestimate the true burden of disease as diagnosis was limited to those  
299 with a Nugent's score of seven to ten.

300 Syndromic management of RTIs is a pragmatic approach in the absence of definitive  
301 diagnosis. However, as has been reported in PNG and elsewhere(30, 37), we found this approach  
302 performed poorly, missing 78.2% of *M. genitalium* infections and three quarters of any RTI.  
303 Symptoms were associated with a higher odds of *T. vaginalis* infection; however, sensitivity  
304 remained low. It is clear that syndromic management is an inadequate tool to effectively treat RTIs,  
305 even for those infections more commonly associated with vaginal discharge. Improved access to  
306 affordable, accurate point-of-care diagnostics may be transformative. There is an urgent need for

307 alternative approaches to more effectively detect and treat asymptomatic RTIs and reduce prevalence  
308 in a cost-effective and feasible manner in resource-limited settings.

309 The main limitation of this study is the facility-based recruitment of participants; results may  
310 not represent women who do not attend any antenatal clinic. Routinely collected provincial data for  
311 the study years estimated 73% to 85% of pregnant women attended clinic at least once during their  
312 pregnancy(45). A limitation of the syphilis data is that it represents lifetime exposure to *Treponema*  
313 species, and as such does not differentiate between active or latent infection, nor are we able to  
314 exclude exposure to yaws. Yaws is endemic in PNG(46), however prevalence estimates vary widely  
315 by region and precise estimates are not known for ENB. A population wide survey on an island in  
316 neighbouring New Ireland Province estimated a population prevalence of 1.8% for active yaws(47).  
317 Additionally, coverage with syphilis rapid tests was affected by supply interruptions.

318 This study provides the first data on *M. genitalium* prevalence and drug resistance markers in  
319 PNG, revealing a high burden of infection that is currently unrecognised, and provides valuable new  
320 data to understand the burden of this infection among pregnant women globally. STIs in pregnancy  
321 were alarmingly common, with 37.8% of pregnant women having at least one current STI. This  
322 study also highlights the high burden of bacterial vaginosis and VCC and clearly shows that current  
323 antenatal screening with syndromic management is inadequate in detecting reproductive tract  
324 infections. Such a high burden of disease with associated impacts on poor sexual and reproductive  
325 health demands urgent action towards ensuring access to affordable prevention, diagnostics and  
326 treatment for communities in PNG and similar settings. This will be crucial for achieving progress  
327 towards the sustainable development goals and improving reproductive health outcomes.

328



329 **NOTES**

330 **Acknowledgements.**

331 The authors would like to extend our heartfelt thanks to the women and infants who participated in  
332 this study, as well as the families and communities who supported them to do so. Our special thanks  
333 to the National Department of Health, the East New Britain Provincial Administration led by Mr  
334 Wilson Matava, the Provincial Health Authority, Catholic Health Services and participating health  
335 facilities (Nonga General Hospital, St Mary's Vunapope, Keravat rural hospital, Napapar health  
336 centre, Papatava health centre) for enthusiastically facilitating our research team to work alongside  
337 them. Specific thanks to Mr Levi Mano and Mr Nicholas Larme, Dr Ako Yap, Mr Moses Bogandri,  
338 Mr Benedict Mode, Dr Pinip Wapi, Dr Felix Diaku, Dr Tanmay Bagade, Dr Delly Babona, Sr  
339 Placidia Nohan, Sr Theonila Wat and Sr Rebecca Penaia who have provided invaluable support and  
340 advice throughout the planning and implementation of this work in ENB. We gratefully acknowledge  
341 the dedication and contribution by our Burnet Institute Kokopo staff who worked tirelessly to  
342 implement this study, specifically we would like to thank: Dr Stenard Hiasihri, Essie Koniel, Pele  
343 Melepia, Hadlee Supsup, Dukduk Kabiu, Ruth Fidelis, Wilson Philip, Priscah Hezeri, Kerryanne  
344 Tokmun, Primrose Homiehombo, Rose Suruka, Benishar Kombut, Thalia Wat, Noelyne Taraba,  
345 Chris Sohenaloe, Dorish Palagat, Zoe Saulep, Elizabeth Walep, Lucy Au, Irene Daniels, Gabriella  
346 Kalimet-Tade, Noreen Tamtilik, Ellen Kavang, Wilson Kondo, Allan Tirang, Michael Palauva, Ioni  
347 Pidian, Teddy Wanahau, Eremas Amos, Bettie Matonge, Elice Adimain, Thelma Punion, Lucy  
348 Palom. Thank you to the invaluable project support from Burnet Institute Melbourne, especially:  
349 Kellie Woiwod, James Lawson, Lisa Davidson, Vivian Newton, Lisa Vitasovich and Rodney  
350 Stewart. We also thank our many collaborators, specifically Prof John Kaldor and Prof Rebecca Guy  
351 for advice on STIs. And for the vision, overall leadership and technical guidance to the HMHB  
352 program provided by Prof Michael Toole, Prof Margaret Hellard and Prof Caroline Homer.

353 **Authors contribution statement.**

354 Study design: led by JGB, BSC, FJIF, CM, MJLS with input from WP, SL, EK, PMS, LJR, AV,  
355 SGB, AJU. Data collection: MJLS, PM, EP, RF. Vaginal smears read by GF. Data analysis,  
356 interpretation and manuscript led by MJLS with input from all authors. All authors read and  
357 approved the final manuscript.

### 358 **Conflict of interest**

359 The authors declare they have no competing interests.

### 360 **Funding**

361 This work was funded by the Burnet Institute with philanthropic support provided by numerous  
362 private and business donors in Australia and PNG, including the Bank South Pacific Community  
363 Grant, Papua New Guinea and the June Canavan Foundation Australia. Several authors receive  
364 funding from the National Health and Medical Research Council (NHMRC) of Australia (Senior  
365 Research Fellowship to JGB and Program Grant to JGB and BSC, Career Development Fellowships  
366 to FJIF and LJR, Postgraduate Research Scholarship to CM. MJLS receives a Basser Research Entry  
367 Scholarship from the Royal Australasian College of Physicians Foundation (2018 and 2020). The  
368 Burnet Institute is supported by an Operational Infrastructure Grant from the State Government of  
369 Victoria, Australia, and the Independent Research Institutes Infrastructure Support Scheme of the  
370 NHMRC of Australia. The funders had no role in study design, implementation or analysis.

371 **Corresponding authors:** Michelle Scoullar, [michelle.scoullar@burnet.edu.au](mailto:michelle.scoullar@burnet.edu.au); James Beeson,  
372 [beeson@burnet.edu.au](mailto:beeson@burnet.edu.au)

373 85 Commercial Road, Melbourne, VIC 3004. +61 3 9282 2111

### 374 **Biographical Sketch of first author**

375 **Dr Michelle Scoullar** is an international health specialist with extensive experience in maternal,  
376 newborn and child health, health system strengthening, and implementation research with practical  
377 clinical and public health program experience in remote Australia, Lao PDR and Papua New Guinea

378 (PNG) and is a practicing medical doctor specialising in neonatology and paediatrics, with additional  
379 postgraduate qualifications in international health and obstetrics and gynaecology. Her primary  
380 research interests focus around health, infection and nutrition in pregnancy and subsequent impacts  
381 on neonatal and infant health, particularly birth weight and growth through infancy.  
382

383 **REFERENCES:**

- 384 1. Newman L, Rowley J, Hoorn SV, Wijesooriya NS, Unemo M, Low N, et al. Global Estimates of the  
385 Prevalence and Incidence of Four Curable Sexually Transmitted Infections in 2012 Based on Systematic  
386 Review and Global Reporting. *PLoS one*. 2015;10(12).
- 387 2. World Health Organization. Report on global sexually transmitted infection surveillance. 2018.
- 388 3. Rowley J, Hoorn SV, Korenromp E, Low N, Unemo M, Abu-Raddad LJ, et al. Chlamydia, gonorrhoea,  
389 trichomoniasis and syphilis: Global prevalence and incidence estimates, 2016. *Bulletin of the World Health  
390 Organization*. 2019;97(8):548-62, 62A-62P.
- 391 4. van de Wijgert JHHM, Jespers V. The global health impact of vaginal dysbiosis. *Research in  
392 Microbiology*. 2017;168(9-10):859-64.
- 393 5. Peebles K, Velloza J, Balkus JE, McClelland RS, Barnabas RV. High Global Burden and Costs of  
394 Bacterial Vaginosis: A Systematic Review and Meta-Analysis. *Sexually Transmitted Diseases*. 2019;46(5):304-  
395 11.
- 396 6. Cauchie M, Desmet S, Lagrou K. *Candida* and its dual lifestyle as a commensal and a pathogen.  
397 *Research in Microbiology*. 2017 2017/11/01;168(9):802-10.
- 398 7. Donovan B. Sexually transmissible infections other than HIV. *The Lancet*. 2004;363(9408):545-56.
- 399 8. Arol OA, Over M, Manhard L, Holmes KK. Sexually Transmitted Infections. In: Dean T Jamison, Joel G  
400 Breman, Anthony R Measham, George Alleyne, Mariam Claeson, David B Evans, et al., editors. *Disease  
401 control priorities in developing countries*. 2nd ed. New York: Oxford University Press; 2006.
- 402 9. Thwaites A, Flanagan K, Datta S. Non-HIV sexually transmitted infections in pregnancy. *Obstetrics,  
403 Gynaecology & Reproductive Medicine*. 2019;29(6):151-7.
- 404 10. Martin DH, Manhart LE, Workowski KA. *Mycoplasma genitalium* From Basic Science to Public Health:  
405 Summary of the Results From a National Institute of Allergy and Infectious Diseases Technical Consultation

- 406 and Consensus Recommendations for Future Research Priorities. *The Journal of infectious diseases*. 2017 Jul  
407 15;216(suppl\_2):S427-S30.
- 408 11. Lis R, Rowhani-Rahbar A, Manhart LE. *Mycoplasma genitalium* infection and female reproductive  
409 tract disease: a meta-analysis. *Clinical infectious diseases : an official publication of the Infectious Diseases  
410 Society of America*. 2015 Aug 1;61(3):418-26.
- 411 12. Sonnenberg P, Ison CA, Clifton S, Field N, Tanton C, Soldan K, et al. Epidemiology of *Mycoplasma  
412 genitalium* in British men and women aged 16-44 years: Evidence from the third National Survey of Sexual  
413 Attitudes and Lifestyles (Natsal-3). *International Journal of Epidemiology*. 2015;44(6):1982-94.
- 414 13. Baumann L, Cina M, Egli-Gany D, Goutaki M, Halbeisen FS, Lohrer G-R, et al. Prevalence  
415 of *Mycoplasma genitalium* in different population groups: systematic review and meta-analysis. *Sexually  
416 transmitted infections*. 2018;94(4):255-62.
- 417 14. Oakeshott P, Hay P, Taylor-Robinson D, Hay S, Dohn B, Kerry S, et al. Prevalence of *Mycoplasma  
418 genitalium* in early pregnancy and relationship between its presence and pregnancy outcome. *BJOG: An  
419 International Journal of Obstetrics and Gynaecology*. 2004;111(12):1464-7.
- 420 15. Harrison MA, Harding-Esch EM, Marks M, Pond MJ, Butcher R, Solomon AW, et al. Impact of mass  
421 drug administration of azithromycin for trachoma elimination on prevalence and azithromycin resistance of  
422 genital *Mycoplasma genitalium* infection. *Sexually transmitted infections*. 2019.
- 423 16. Lau A, Bradshaw CS, Lewis D, Fairley CK, Chen MY, Kong FY, et al. The Efficacy of Azithromycin for the  
424 Treatment of Genital *Mycoplasma genitalium*: A Systematic Review and Meta-analysis. *Clinical infectious  
425 diseases : an official publication of the Infectious Diseases Society of America*. 2015 Nov 1;61(9):1389-99.
- 426 17. Sweeney EL, Trembizki E, Bletchly C, Bradshaw CS, Menon A, Francis F, et al. Levels of *mycoplasma  
427 genitalium* antimicrobial resistance differ by both region and gender in the state of Queensland, Australia:  
428 Implications for treatment guidelines. *Journal of Clinical Microbiology*. 2019;57(3).

- 429 18. Read TRH, Fairley CK, Murray GL, Jensen JS, Danielewski J, Worthington K, et al. Outcomes of  
430 resistance-guided sequential treatment of mycoplasma genitalium infections: A prospective evaluation.  
431 Clinical Infectious Diseases. 2019;68(4):554-60.
- 432 19. The World Bank Group. Papua New Guinea. 2019; Available from:  
433 <https://data.worldbank.org/country/papua-new-guinea>.
- 434 20. Vallely LM, Toliman P, Ryan C, Rai G, Wapling J, Tomado C, et al. Prevalence and risk factors of  
435 Chlamydia trachomatis, Neisseria gonorrhoeae, Trichomonas vaginalis and other sexually transmissible  
436 infections among women attending antenatal clinics in three provinces in Papua New Guinea: a cross-  
437 sectional survey. Sex Health. 2016 Oct;13(5):420-7.
- 438 21. Mola G, Amoa A, Bagita M, Augerea L, Geita L, O'Connor M. Manual of Standard Managements in  
439 Obstetrics and Gynaecology for Doctors, HEOs and Nurses in Papua New Guinea. 7th ed. Glen DL Mola,  
440 editor. Port Moresby, Papua New Guinea: World Health Organization; 2016.
- 441 22. National Department of Health. Standard Treatment Guidelines for common illness of adults in  
442 Papua New Guinea. 6th ed. Manning L, editor. Port Moresby, Papua New Guinea: World Health  
443 Organization; 2012.
- 444 23. Tabrizi SN, Su J, Bradshaw CS, Fairley CK, Walker S, Tan LY, et al. Prospective evaluation of  
445 ResistancePlus MG, a new multiplex quantitative PCR assay for detection of Mycoplasma genitalium and  
446 macrolide resistance. Journal of Clinical Microbiology. 2017;55(6):1915-9.
- 447 24. Su JP, Tan LY, Garland SM, Tabrizi SN, Mokany E, Walker S, et al. Evaluation of the SpeeDx  
448 ResistancePlus MG diagnostic test for mycoplasma genitalium on the applied biosystems 7500 fast  
449 quantitative PCR platform. Journal of Clinical Microbiology. 2018;56(1).
- 450 25. Pitt R, Cole MJ, Fifer H, Woodford N. Evaluation of the Mycoplasma genitalium Resistance Plus kit for  
451 the detection of M. genitalium and mutations associated with macrolide resistance. Sexually transmitted  
452 infections. 2018;94(8):565-7.

- 453 26. Vallely A, Page A, Dias S, Siba P, Lupiwa T, Law G, et al. The prevalence of sexually transmitted  
454 infections in Papua New Guinea: a systematic review and meta-analysis. *PloS one*. 2010;5(12):e15586.
- 455 27. Jensen JS, Cusini M, Gomberg M, Moi H. 2016 European guideline on *Mycoplasma genitalium*  
456 infections. *J Eur Acad Dermatol Venereol*. 2016 Oct;30(10):1650-6.
- 457 28. Donders GGG, Ruban K, Bellen G, Petricevic L. *Mycoplasma/Ureaplasma* infection in pregnancy: To  
458 screen or not to screen. *Journal of Perinatal Medicine*. 2017;45(5):505-15.
- 459 29. Deborde M, Pereyre S, Puges M, Bébéar C, Desclaux A, Hessamfar M, et al. High prevalence of  
460 *Mycoplasma genitalium* infection and macrolide resistance in patients enrolled in HIV pre-exposure  
461 prophylaxis program. *Medecine et Maladies Infectieuses*. 2019;49(5):347-9.
- 462 30. Hoffman CM, Mbambazela N, Sithole P, Morré SA, Dubbink JH, Railton J, et al. Provision of Sexually  
463 Transmitted Infection Services in a Mobile Clinic Reveals High Unmet Need in Remote Areas of South Africa:  
464 A Cross-sectional Study. *Sexually Transmitted Diseases*. 2019;46(3):206-12.
- 465 31. Cohen CR, Nosek M, Meier A, Astete SG, Iverson-Cabral S, Mugo NR, et al. *Mycoplasma genitalium*  
466 infection and persistence in a cohort of female sex workers in Nairobi, Kenya. *Sex Transm Dis*. 2007  
467 May;34(5):274-9.
- 468 32. Vandepitte J, Muller E, Bukenya J, Nakubulwa S, Kyakuwa N, Buve A, et al. Prevalence and correlates  
469 of *Mycoplasma genitalium* infection among female sex workers in Kampala, Uganda. *The Journal of*  
470 *infectious diseases*. 2012 Jan 15;205(2):289-96.
- 471 33. Peuchant O, Le Roy C, Desveaux C, Paris A, Asselineau J, Maldonado C, et al. Screening for Chlamydia  
472 trachomatis, *Neisseria gonorrhoeae*, and *Mycoplasma genitalium* should it be integrated into routine  
473 pregnancy care in French young pregnant women? *Diagn Microbiol Infect Dis*. 2015 May;82(1):14-9.
- 474 34. Labbe AC, Frost E, Deslandes S, Mendonca AP, Alves AC, Pepin J. *Mycoplasma genitalium* is not  
475 associated with adverse outcomes of pregnancy in Guinea-Bissau. *Sexually transmitted infections*. 2002  
476 Aug;78(4):289-91.

- 477 35. Wangnapi RA, Soso S, Unger HW, Sawera C, Ome M, Umbers AJ, et al. Prevalence and risk factors for  
478 Chlamydia trachomatis, Neisseria gonorrhoeae and Trichomonas vaginalis infection in pregnant women in  
479 Papua New Guinea. *Sexually transmitted infections*. 2015 May;91(3):194-200.
- 480 36. Marks M, Kako H, Butcher R, Lauri B, Puiahi E, Pitakaka R, et al. Prevalence of sexually transmitted  
481 infections in female clinic attendees in Honiara, Solomon Islands. *BMJ open*. 2015;5(4):e007276.
- 482 37. Vallely LM, Toliman P, Ryan C, Rai G, Wapling J, Gabuzzi J, et al. Performance of syndromic  
483 management for the detection and treatment of genital Chlamydia trachomatis, Neisseria gonorrhoeae and  
484 Trichomonas vaginalis among women attending antenatal, well woman and sexual health clinics in Papua  
485 New Guinea: a cross-sectional study. *BMJ open*. 2017 Dec 29;7(12):e018630.
- 486 38. Unger HW, Ome-Kaius M, Wangnapi RA, Umbers AJ, Hanieh S, Suen CSNLW, et al. Sulphadoxine-  
487 pyrimethamine plus azithromycin for the prevention of low birthweight in Papua New Guinea: A randomised  
488 controlled trial. *BMC Medicine*. 2015;13(1).
- 489 39. Peters RPH, Dubbink JH, Van Der Eem L, Verweij SP, Bos MLA, Ouburg S, et al. Cross-sectional study  
490 of genital, rectal, and pharyngeal chlamydia and gonorrhoea in women in rural South Africa. *Sexually  
491 Transmitted Diseases*. 2014;41(9):564-9.
- 492 40. Moodley D, Moodley P, Sebitloane M, Soowamber D, McNaughton-Reyes HL, Groves AK, et al. High  
493 prevalence and incidence of asymptomatic sexually transmitted infections during pregnancy and  
494 postdelivery in KwaZulu Natal, South Africa. *Sexually Transmitted Diseases*. 2015;42(1):43-7.
- 495 41. Badman SG, Vallely LM, Toliman P, Kariwiga G, Lote B, Pomat W, et al. A novel point-of-care testing  
496 strategy for sexually transmitted infections among pregnant women in high-burden settings: results of a  
497 feasibility study in Papua New Guinea. *BMC Infectious Diseases*. 2016;16(1).
- 498 42. Pappas PG, Kauffman CA, Andes D, Benjamin Jr DK, Calandra TF, Edwards Jr JE, et al. Clinical practice  
499 guidelines for the management of candidiasis: 2009 Update by the Infectious Diseases Society of America.  
500 *Clinical Infectious Diseases*. 2009;48(5):503-35.



- 501 43. Klufio CA, Amoa AB, Delamare O, Hombhanje M, Kariwiga G, Igo J. Prevalence of vaginal infections  
502 with bacterial vaginosis, *Trichomonas vaginalis* and *Candida albicans* among pregnant women at the Port  
503 Moresby General Hospital Antenatal Clinic. *Papua and New Guinea medical journal*. 1995;38(3):163-71.
- 504 44. Sobel JD. Vulvovaginal candidosis. *Lancet*. 2007;369(9577):1961-71.
- 505 45. Papua New Guinea National Department of Health. Sector Performance Annual Review. 2018.
- 506 46. Mitjà O, Marks M, Konan DJP, Ayelo G, Gonzalez-Beiras C, Boua B, et al. Global epidemiology of  
507 yaws: a systematic review. *The Lancet Global Health*. 2015;3(6):e324-e31.
- 508 47. Mitjà O, Godornes C, Houineï W, Kapa A, Paru R, Abel H, et al. Re-emergence of yaws after single  
509 mass azithromycin treatment followed by targeted treatment: a longitudinal study. *The Lancet*.  
510 2018;391(10130):1599-607.

511

512

513 **TABLE 1:** Socio-demographic characteristics and obstetric history of women at first antenatal clinic  
 514 visit in East New Britain, PNG.

| <b>Total at ANC1 n (%)</b>                         |                       |
|----------------------------------------------------|-----------------------|
| N=699 unless specified                             |                       |
| <b>Sociodemographic details for enrolled women</b> |                       |
| Enrolment Clinic                                   |                       |
| Vunapope                                           | 184 (26.3)            |
| Nonga                                              | 83 (11.9)             |
| Keravat                                            | 125 (17.9)            |
| Napapar                                            | 158 (22.6)            |
| Paparatava                                         | 149 (21.3)            |
| Clinic administration                              |                       |
| Government                                         | 208 (29.8)            |
| Catholic Health                                    | 491 (70.2)            |
| Location                                           |                       |
| Urban                                              | 342 (48.9)            |
| Rural                                              | 357 (51.1)            |
| Age, years <sup>a</sup>                            | 26 {22 – 30}, 16 - 49 |
| Highest level of education completed <sup>b</sup>  |                       |
| Primary (Grade 8 or less)                          | 325 (46.5)            |
| High school (grade 9,10)                           | 177 (25.4)            |
| Secondary / Vocational / Tertiary                  | 196 (28.1)            |

Employment status

|                                  |            |
|----------------------------------|------------|
| Not employed                     | 531 (76.0) |
| Employed in paid work or student | 168 (24.0) |

Province of birth

|                  |            |
|------------------|------------|
| East New Britain | 578 (82.7) |
| Other Province   | 121 (17.3) |

Religion<sup>b</sup>

|          |            |
|----------|------------|
| Catholic | 345 (49.4) |
| Other    | 353 (50.5) |

Marital status<sup>c</sup>

|                              |            |
|------------------------------|------------|
| Married or cohabiting        | 663 (95.1) |
| Single, seperated or widowed | 34 (4.9)   |

Poligamy<sup>d</sup>

|                    |            |
|--------------------|------------|
| One wife           | 583 (88.1) |
| More than one wife | 79 (11.9)  |

Household monthly expenditure in Kina<sup>e</sup> 150 {50-300}

Cost of ANC in Kina<sup>f</sup> 4 {2-20}

**Family Planning**

Method used<sup>a</sup>

|                             |            |
|-----------------------------|------------|
| Never used modern FP method | 569 (82.5) |
| Has used modern FP method   | 121 (17.5) |

**Maternal Health Parameters at 1st Antenatal Clinic**

Gravidity

|                     |            |
|---------------------|------------|
| Primigravidae       | 177 (25.3) |
| Multigravidae (2-4) | 384 (54.9) |
| Grandmulti (≥5)     | 138 (19.7) |

Abnormal vaginal discharge

|                                                     |            |
|-----------------------------------------------------|------------|
| Abnormal discharge at any time in preg <sup>b</sup> | 135 (19.3) |
| Current symptoms <sup>c</sup>                       | 98 (14.0)  |

Smoking<sup>c</sup>

|                       |            |
|-----------------------|------------|
| Never smoked          | 427 (61.3) |
| Stopped when pregnant | 241 (34.6) |
| Current smoker        | 29 (4.2)   |

**Previous pregnancy outcomes**

|                                         |            |
|-----------------------------------------|------------|
| Age at first pregnancy <sup>d</sup>     | 21 {19-24} |
| History pregnancy loss (in multiparous) | n=522      |
| History of miscarriage                  | 46 (8.8)   |
| History of abortion                     | 1 (0.2)    |
| History of stillbirth                   | 16 (3.1)   |

**Partner details**

|                             |            |
|-----------------------------|------------|
| Partner's employment status |            |
| Not employed                | 269 (39.6) |
| Employed in paid work       | 411 (60.4) |
| Partner attending ANC1      |            |

|     |            |
|-----|------------|
| No  | 571 (82.3) |
| Yes | 123 (17.7) |

---

**Data are mean [SD], range; or median {IQR}, range; or n (%)**

Missing Data n(%): <sup>a</sup>9 (1.3), <sup>b</sup>1 (0.1), <sup>c</sup>2(0.3), <sup>d</sup>37 (5.3), <sup>e</sup>36 (5.1), <sup>f</sup>17 (2.4), <sup>g</sup>7(1)

515

516

517 **TABLE 2.** Prevalence of reproductive tract infections among pregnant women in ENB PNG

| <b>Reproductive Tract Infection</b>                   | <b>Obs</b> | <b>Freq</b> | <b>Prevalence % (95% CI)</b> |
|-------------------------------------------------------|------------|-------------|------------------------------|
| <i>Mycoplasma genitalium</i>                          | 625        | 78          | 12.5 (10.0 - 15.4)           |
| <i>Chlamydia trachomatis</i>                          | 640        | 122         | 19.1 (16.1 - 22.4)           |
| <i>Neisseria gonorrhoeae</i>                          | 640        | 35          | 5.5 (3.9 - 7.6)              |
| <i>Trichomonas vaginalis</i>                          | 581        | 117         | 20.2 (17.0 - 23.7)           |
| Syphilis (Alere Determine)                            | 437        | 79          | 18.1 (14.6 - 22.1)           |
| Bacterial Vaginosis                                   | 503        | 129         | 25.7 (21.9 - 29.7)           |
| Vulvovaginal candidiasis                              | 503        | 198         | 39.4 (35.1 - 43.8)           |
| <b>At least 1 of a group of RTIs<sup>a</sup></b>      |            |             |                              |
| At least 1 current RTI <sup>a</sup>                   | 357        | 272         | 76.2 (71.5 - 80.6)           |
| At least 1 current STI <sup>b</sup>                   | 485        | 183         | 37.8 (33.5 - 42.3)           |
| At least 1 of MG, CT, NG, TV or Syphilis              | 302        | 144         | 47.7 (42.0 - 53.5)           |
| At least 1 of MG, CT, NG, TV or BV                    | 357        | 197         | 55.2 (49.9 - 60.5)           |
| At least 1 GeneXpert diagnosed infection <sup>c</sup> | 546        | 175         | 32.1 (28.2 - 36.2)           |
| At least 1 vaginal infection <sup>d</sup>             | 409        | 281         | 68.8 (64.0 - 73.2)           |
| At least 1 of BV or VVC                               | 503        | 293         | 58.3 (53.9 - 62.6)           |
| <b>Multiple current STIs</b>                          |            |             |                              |
| Any 2 current STIs                                    | 661        | 75          | 11.4 (9.1 - 14.1)            |
| Any 3 current STIs                                    | 536        | 15          | 2.8 (1.6 - 4.6)              |

<sup>a</sup>Participants result included only if they had all tests done for each of the infections within group of RTIs

<sup>a</sup> current RTI includes at least 1 of MG, CT, NG, TV, BC or VVC (syphilis not included)

<sup>b</sup> current STI includes at least 1 of MG, CT, NG, TV (syphilis not included)

<sup>c</sup> GeneXpert diagnosed infections include any 1 of CT, NG or TV

<sup>d</sup> vaginal infections includes at least 1 of BV, TV or VVC

RTI (reproductive tract infection), STI (Sexually transmitted infection), MG (*Mycoplasma genitalium*), CT (*Chlamydia trachomatis*), NG (*Neisseria gonorrhoea*), TV (*Trichomonas vaginalis*), BV (Bacterial Vaginosis), VVC (Vulvovaginal candidiasis)

518

519

520 **FIGURE 1:** Relationships between current STIs: *Mycoplasma genitalium* (MG), *Chlamydia*  
521 *trachomatis* (CT), *Neisseria gonorrhoea* (NG) and *Trichomonas vaginalis* (TV). Each line  
522 connecting two or more infections represents one participant. Mono infections are represented by the  
523 space under each STI with no lines.

524

525

526 **FIGURE 2:** Sensitivity of syndromic management using the standard question as per PNG national  
527 guidelines “Do you currently have any abnormal vaginal discharge?”, or an alternative question  
528 “Have you experienced any abnormal vaginal discharge earlier in the pregnancy or now?”.

529

530

531 **TABLE 3:** Number of women with a Reproductive Tract Infection and symptoms (abnormal vaginal  
532 discharge)

|                                                       | Question as per syndromic management                  |           |       | Alternative question                                                                  |            |       |
|-------------------------------------------------------|-------------------------------------------------------|-----------|-------|---------------------------------------------------------------------------------------|------------|-------|
|                                                       | Do you currently have any abnormal vaginal discharge? |           |       | Have you experienced any abnormal vaginal discharge earlier in the pregnancy or now?^ |            |       |
|                                                       | No n(%)                                               | Yes n(%)  | Total | No n(%)                                                                               | Yes n(%)   | Total |
|                                                       | 599 (85.9)                                            | 98 (14.1) | 697   | 563 (80.7)                                                                            | 135 (19.3) | 698   |
| <b>Reproductive Tract Infection</b>                   |                                                       |           |       |                                                                                       |            |       |
| <i>Mycoplasma genitalium</i>                          | 66 (84.6)                                             | 12 (15.4) | 78    | 61 (78.2)                                                                             | 17 (21.8)  | 78    |
| <i>Chlamydia trachomatis</i>                          | 98 (80.3)                                             | 24 (19.7) | 122   | 90 (73.8)                                                                             | 32 (26.2)  | 122   |
| <i>Neisseria gonorrhoeae</i>                          | 28 (80.0)                                             | 7 (20.0)  | 35    | 26 (74.3)                                                                             | 9 (25.7)   | 35    |
| <i>Trichomonas vaginalis</i>                          | 94 (80.3)                                             | 23 (19.7) | 117   | 83 (70.9)                                                                             | 34 (29.1)  | 117   |
| Syphilis (Alere Determine)                            | 68 (86.1)                                             | 11 (13.9) | 79    | 65 (82.3)                                                                             | 14 (17.7)  | 79    |
| Bacterial Vaginosis                                   | 109 (84.5)                                            | 20 (15.5) | 129   | 101 (78.3)                                                                            | 28 (21.7)  | 129   |
| Vulvovaginal candidiasis                              | 160 (80.8)                                            | 38 (19.2) | 198   | 146 (73.7)                                                                            | 52 (26.3)  | 198   |
| <b>At least 1 of a group of RTIs</b>                  |                                                       |           |       |                                                                                       |            |       |
| At least 1 current RTI <sup>a</sup>                   | 224 (82.3)                                            | 48 (17.6) | 272   | 204 (75.0)                                                                            | 68 (25.0)  | 272   |
| At least 1 current STI <sup>b</sup>                   | 154 (84.1)                                            | 29 (15.8) | 183   | 141 (77.0)                                                                            | 42 (22.9)  | 183   |
| At least 1 GeneXpert diagnosed infection <sup>c</sup> | 141 (80.6)                                            | 34 (19.4) | 175   | 127 (72.6)                                                                            | 48 (27.4)  | 175   |
| At least 1 vaginal infection <sup>d</sup>             | 228 (81.1)                                            | 53 (18.9) | 281   | 207 (73.7)                                                                            | 74 (26.3)  | 281   |
| At least 1 of BV or VVC                               | 242 (82.6)                                            | 51 (17.4) | 293   | 222 (75.8)                                                                            | 71 (24.2)  | 293   |



| Multiple current STIs |           |           |    |           |           |    |
|-----------------------|-----------|-----------|----|-----------|-----------|----|
| Any 2 current STIs    | 58 (77.3) | 17 (22.7) | 75 | 53 (70.7) | 22 (29.3) | 75 |

<sup>^1</sup> 1 woman who responded yes to the second question had a missing response to the first question

<sup>a</sup> active RTI includes at least 1 of MG, CT, NG, TV, BC or VVC (syphilis not included)

<sup>b</sup> active STI includes at least 1 of MG, CT, NG, TV (syphilis not included)

<sup>c</sup> GeneXpert diagnosed infections include any 1 of CT, NG or TV

<sup>d</sup> vaginal infections includes at least 1 of BV, TV or VVC

MG (Mycoplasma genitalium), CT (Chlamydia trachomatis), NG (Neisseria gonorrhoea), TV (Trichomonas vaginalis), BV (Bacterial Vaginosis), VVC (Vulvovaginal candidiasis)

533

534

535 **TABLE 4:** Multivariable analysis of factors associated with curable Sexually Transmitted Infections.

| Multivariable analysis   | <b>Mycoplasma Genitalium</b> | <b>Chlamydia</b>            | <b>Gonorrhoea</b>            | <b>Trichomonas</b>         | <b>Syphilis (Alere Determine)</b> |
|--------------------------|------------------------------|-----------------------------|------------------------------|----------------------------|-----------------------------------|
|                          | aOR (95% CI) ; p value       | aOR (95% CI) ; p value      | aOR (95% CI) ; p value       | aOR (95% CI) ; p value     | aOR (95% CI) ; p value            |
| <b>Enrolment Clinic</b>  |                              |                             |                              |                            |                                   |
| Vunapope(REF)            | REF                          | REF                         | REF                          | REF                        | REF                               |
| Nonga                    | 0.67 (0.29-1.59) ; 0.363     | 0.86 (0.43 - 1.73) ; 0.662  | 2.25 (0.73 - 6.96) ; 0.16    | 0.82 (0.39 - 1.74) ; 0.591 | 0.3 (0.12 - 0.71) ; 0.006         |
| Keravat                  | 0.93 (0.45-1.93) ; 0.839     | 0.59 (0.3 - 1.14) ; 0.112   | 1.04 (0.31 - 3.48) ; 0.96    | 0.8 (0.4 - 1.62) ; 0.532   | 0.62 (0.3 - 1.26) ; 0.18          |
| Napapar                  | 0.73 (0.36-1.49) ; 0.379     | 0.95 (0.54 - 1.67) ; 0.835  | 1.12 (0.37 - 3.4) ; 0.844    | 1.08 (0.61 - 1.93) ; 0.798 | 0.44 (0.22 - 0.89) ; 0.022        |
| Paparatava               | 0.88 (0.45-1.74) ; 0.707     | 0.83 (0.46 - 1.51) ; 0.532  | 1.93 (0.67 - 5.57) ; 0.227   | 0.99 (0.54 - 1.78) ; 0.948 | 0.29 (0.14 - 0.64) ; 0.002        |
| <b>Gravidity</b>         |                              |                             |                              |                            |                                   |
| Multigravida (REF)       | REF                          | REF                         | REF                          | REF                        | REF                               |
| Primigravid              | 1.06 (0.6-1.85) ; 0.863      | 2.73 (1.74 - 4.28) ; <0.001 | 5.90 (2.69 - 12.96) ; <0.001 | 1.47 (0.91 - 2.37) ; 0.121 | 1.41 (0.8 - 2.52) ; 0.243         |
| <b>Marital status</b>    |                              |                             |                              |                            |                                   |
| Married/Cohabiting (REF) | REF                          | REF                         | REF                          | REF                        | REF                               |
| Single or separated      | 1.10 (0.36-3.37) ; 0.875     | 1.42 (0.62 - 3.27) ; 0.419  | 0.48 (0.10 - 2.31) ; 0.356   | 3.87 (1.69 - 8.86) ; 0.001 | 0.45 (0.1 - 2.08) ; 0.301         |

**Vaginal discharge**

|                                               |                          |                          |                            |                            |                            |
|-----------------------------------------------|--------------------------|--------------------------|----------------------------|----------------------------|----------------------------|
| No symptoms (REF)                             | REF                      | REF                      | REF                        | REF                        | REF                        |
| Abnormal discharge prior to ANC1 or currently | 1.17 (0.64-2.13) ; 0.623 | 1.35 (0.83 - 2.2) ; 0.24 | 1.54 (0.67 - 3.56) ; 0.314 | 1.70 (1.04 - 2.78) ; 0.036 | 0.94 (0.48 - 1.82) ; 0.833 |

**Contraception use**

|                                   |                         |                         |                           |                           |                           |
|-----------------------------------|-------------------------|-------------------------|---------------------------|---------------------------|---------------------------|
| Has used a modern method FP (REF) | REF                     | REF                     | REF                       | REF                       | REF                       |
| Never used modern method FP       | 1.89 (0.85-4.18) ; 0.12 | 1.1 (0.6 - 2.03) ; 0.77 | 0.82 (0.25 - 2.69) ; 0.74 | 1.35 (0.72 - 2.55) ; 0.36 | 1.84 (0.84 - 4.05) ; 0.13 |

**Employment status**

|                   |                          |                           |                            |                            |                            |
|-------------------|--------------------------|---------------------------|----------------------------|----------------------------|----------------------------|
| Not employed(REF) | REF                      | REF                       | REF                        | REF                        | REF                        |
| Employed          | 0.88 (0.49-1.57) ; 0.642 | 1.27 (0.8 - 2.03) ; 0.318 | 2.45 (1.17 - 5.17) ; 0.019 | 0.96 (0.58 - 1.58) ; 0.843 | 0.74 (0.39 - 1.41) ; 0.351 |

---

Abbreviations: OR, odds ratio; CI, confidence interval; FP, family planning

536

537

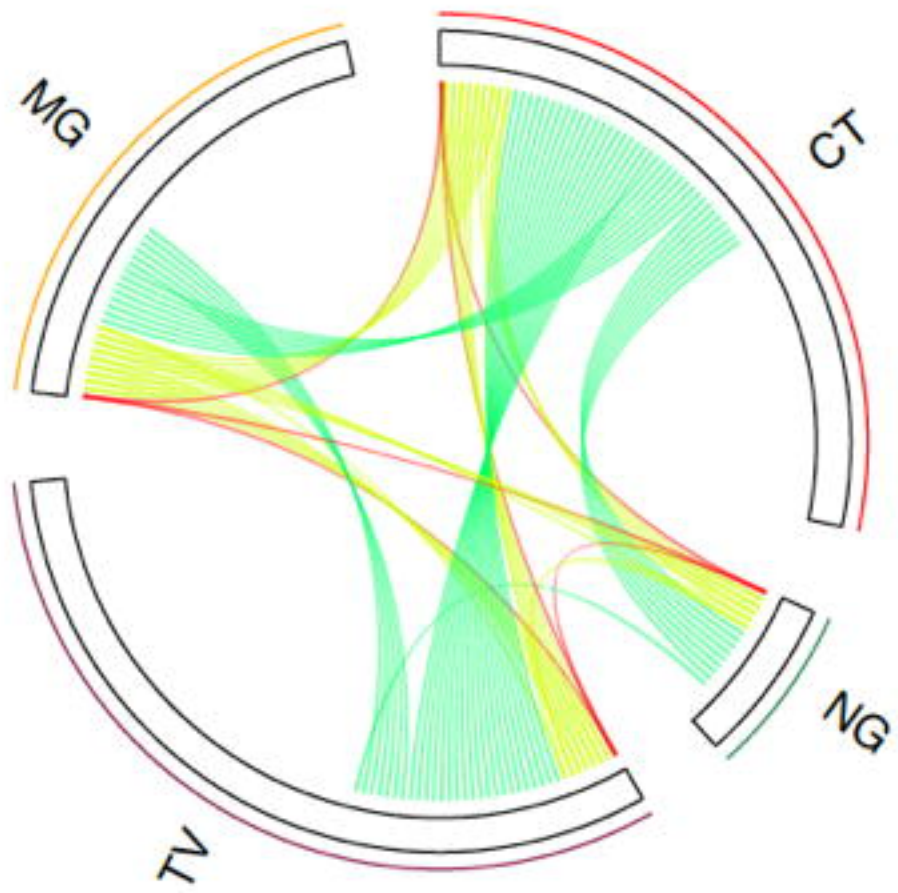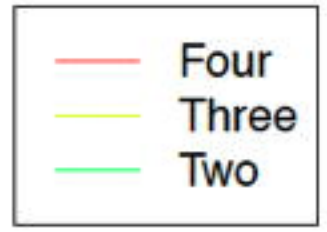

## Sensitivity of symptoms for diagnosing RTIs in pregnant women

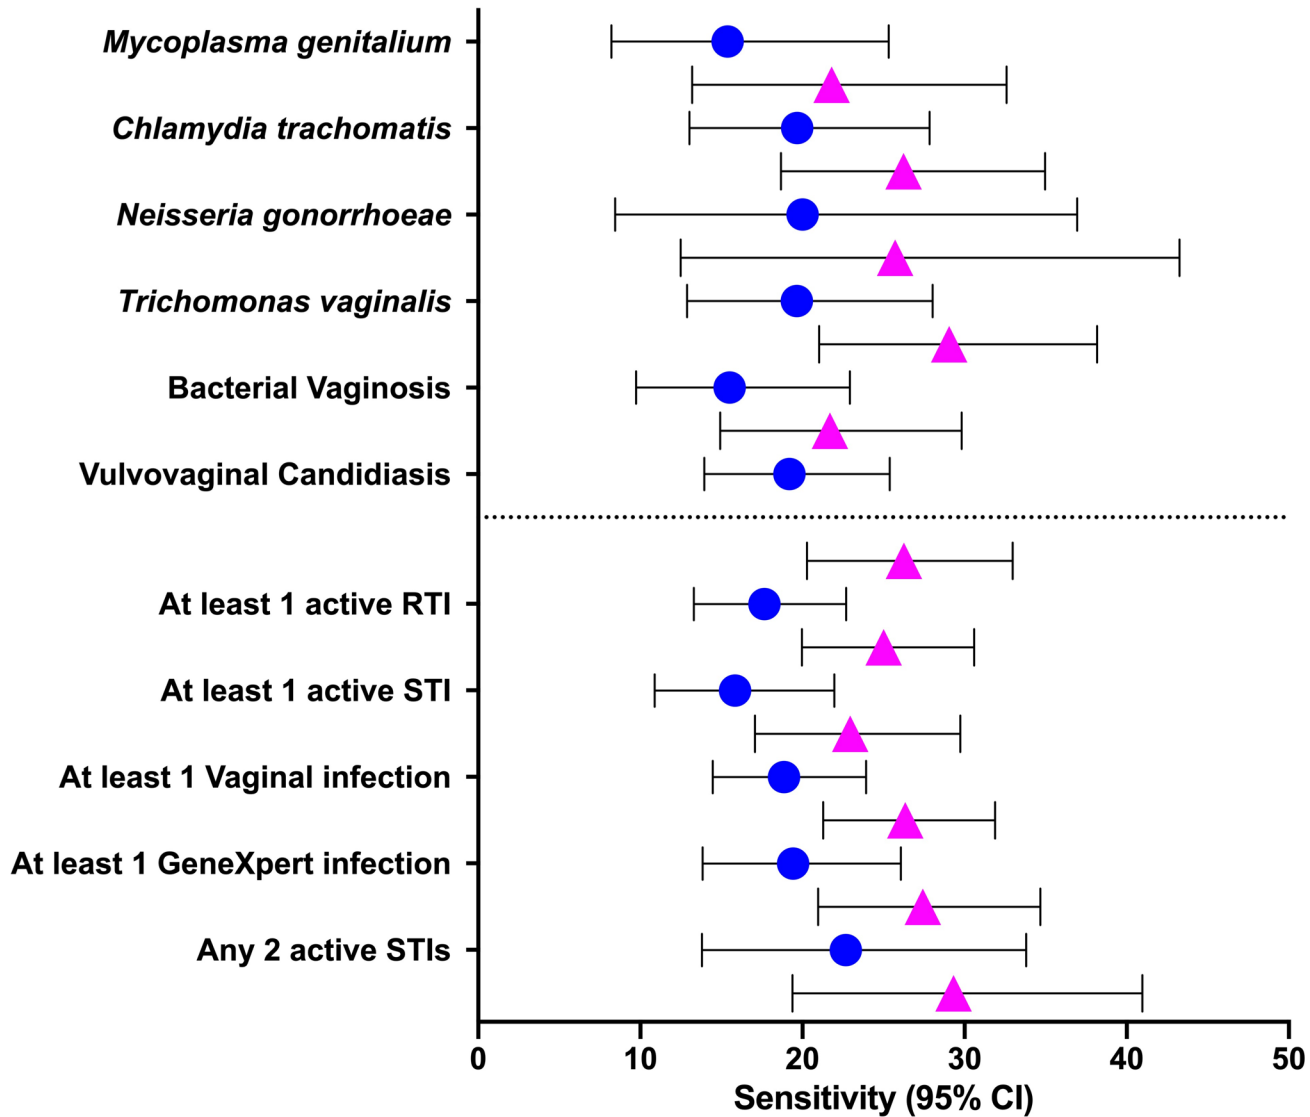

● Standard syndromic management: Do you currently have any abnormal vaginal discharge?

▲ Alternative question: Have you experienced any abnormal vaginal discharge earlier in the pregnancy or now?
